# Supplementary material
Source: publisher site journal article supplement (https://www.spandidos-publications.com/2155/downloadSupplementary)
Supplement: Supplementary file 1 [file downloadSupplementary]

## Sheet: Table SII
Table SII. The differentially expressed miRNAs in HUVEC treated with H2O2 compared to the HUVEC untreated with H2O2.
Gene ID	HUVEC-H2O2-Expression	HUVEC-NC-Expression	HUVEC-H2O2-TPM	HUVEC-NC-TPM	Log2Ratio (HUVEC-NC/HUVEC-H2O2)	Up-Down-Regulation (HUVEC-NC/HUVEC-H2O2)	P-value	FDR
hsa-miR-1-3p	11	29099	1.16912	2391.45	10.9982	Up	0	0
hsa-miR-200c-3p	18	865	1.91311	71.0884	5.21562	Up	4.54e-163	1.61e-161
hsa-miR-451a	2	92	0.212568	7.56085	5.15255	Up	3.02e-18	3.91e-17
hsa-miR-200b-3p	15	243	1.59426	19.9705	3.64691	Up	1.01e-36	1.88e-35
hsa-miR-885-5p	6	96	0.637704	7.88958	3.62899	Up	3.43e-15	4.09e-14
hsa-miR-200a-5p	36	514	3.82622	42.2421	3.46469	Up	1.21e-72	2.94e-71
hsa-miR-146a-5p	1620	22422	172.18	1842.71	3.41984	Up	0	0
hsa-miR-6717-5p	13	172	1.38169	14.1355	3.35481	Up	1.68e-24	2.52e-23
hsa-miR-375	7	78	0.743988	6.41028	3.10704	Up	5.44e-11	5.44e-10
hsa-miR-323a-5p	18	197	1.91311	16.1901	3.08112	Up	1.16e-25	1.78e-24
hsa-miR-206	5	44	0.53142	3.61606	2.76649	Up	5.06e-06	3.93e-05
hsa-miR-203a-3p	4	35	0.425136	2.87641	2.75827	Up	5.46e-05	0.000374302
hsa-miR-9-5p	97	804	10.3096	66.0752	2.68013	Up	1.35e-85	3.42e-84
hsa-miR-499a-5p	10	71	1.06284	5.835	2.45681	Up	5.49e-08	4.85e-07
hsa-miR-1298-5p	130	871	13.8169	71.5815	2.37315	Up	2e-79	4.92e-78
hsa-miR-6728-5p	67	445	7.12103	36.5715	2.36056	Up	4.41e-41	8.46e-40
hsa-miR-4664-3p	86	568	9.14043	46.68	2.35247	Up	9.04e-52	1.89e-50
hsa-miR-147b	45	294	4.78278	24.1618	2.33681	Up	2.7e-27	4.32e-26
hsa-miR-155-5p	5925	35272	629.733	2898.76	2.20263	Up	0	0
hsa-miR-8485	8	47	0.850272	3.86261	2.18358	Up	5.18e-05	0.000356814
hsa-miR-141-3p	27	150	2.86967	12.3275	2.10292	Up	8.74e-13	9.28e-12
hsa-miR-8055	9	48	0.956556	3.94479	2.04403	Up	9.62e-05	0.000644144
hsa-miR-4473	36	186	3.82622	15.2861	1.99822	Up	1.66e-14	1.92e-13
hsa-miR-4663	10	51	1.06284	4.19134	1.97949	Up	8.52e-05	0.000572009
hsa-miR-369-5p	242	1195	25.7207	98.2088	1.93292	Up	5.71e-81	1.42e-79
hsa-miR-378g	12	58	1.27541	4.76662	1.90201	Up	4.63e-05	0.000319737
hsa-miR-340-3p	47	220	4.99535	18.0803	1.85576	Up	3.05e-15	3.67e-14
hsa-miR-422a	42	190	4.46393	15.6148	1.80653	Up	7.49e-13	7.99e-12
hsa-miR-146b-5p	172	775	18.2809	63.6919	1.80078	Up	1.11e-47	2.23e-46
hsa-miR-3074-3p	14	62	1.48798	5.09535	1.77583	Up	6.54e-05	0.000444437
hsa-miR-224-5p	526	2193	55.9054	180.228	1.68876	Up	9.1e-119	2.87e-117
hsa-miR-548aw	63	262	6.69589	21.532	1.68513	Up	1.65e-15	2.01e-14
hsa-miR-6852-5p	41	163	4.35764	13.3958	1.62017	Up	1.34e-09	1.3e-08
hsa-miR-132-5p	131	519	13.9232	42.653	1.61516	Up	2.27e-27	3.66e-26
hsa-miR-3928-5p	35	137	3.71994	11.2591	1.59774	Up	4.14e-08	3.71e-07
hsa-miR-16-2-3p	363	1391	38.5811	114.317	1.56707	Up	3.99e-67	9.39e-66
hsa-miR-4297	20	75	2.12568	6.16373	1.53588	Up	9.81e-05	0.000654518
hsa-miR-513c-3p	57	213	6.05819	17.505	1.53081	Up	3.91e-11	3.92e-10
hsa-miR-6514-3p	88	324	9.35299	26.6273	1.50941	Up	7.46e-16	9.2e-15
hsa-miR-454-3p	722	2607	76.7371	214.251	1.48131	Up	1.12e-112	3.4e-111
hsa-miR-4788	27	97	2.86967	7.97176	1.47401	Up	1.83e-05	0.000134747
hsa-miR-3687	62	222	6.58961	18.2447	1.46921	Up	7.77e-11	7.68e-10
hsa-miR-200a-3p	63	215	6.69589	17.6694	1.3999	Up	9.05e-10	8.81e-09
hsa-miR-221-5p	478	1631	50.8038	134.041	1.39966	Up	2.13e-64	4.8e-63
hsa-miR-8083	31	104	3.2948	8.54705	1.37523	Up	3.08e-05	0.000217812
hsa-miR-4277	44	147	4.6765	12.0809	1.36923	Up	7.41e-07	6.12e-06
hsa-let-7f-5p	71950	239028	7647.14	19644.1	1.3611	Up	0	0
hsa-miR-5091	57	189	6.05819	15.5326	1.35834	Up	2.4e-08	2.16e-07
hsa-miR-10b-5p	177376	584741	18852.2	48055.8	1.34998	Up	0	0
hsa-miR-7-5p	2639	8548	280.484	702.501	1.32458	Up	1.58e-297	7.42e-296
hsa-miR-26b-5p	844	2649	89.7037	217.703	1.27912	Up	1.21e-87	3.1e-86
hsa-miR-148a-3p	113520	355172	12065.4	29189.1	1.27456	Up	0	0
hsa-miR-576-5p	73	228	7.75873	18.7378	1.27205	Up	8.17e-09	7.53e-08
hsa-miR-30e-5p	147	449	15.6238	36.9002	1.23989	Up	2.56e-15	3.09e-14
hsa-miR-30a-5p	13769	41815	1463.42	3436.49	1.23159	Up	0	0
hsa-miR-30e-3p	4113	12312	437.146	1011.84	1.21079	Up	0	0
hsa-miR-323b-3p	558	1648	59.3065	135.438	1.19137	Up	2.88e-48	5.87e-47
hsa-miR-567	96	283	10.2033	23.2578	1.18869	Up	1.79e-09	1.73e-08
hsa-miR-1261	889	2591	94.4865	212.936	1.17224	Up	1.46e-72	3.51e-71
hsa-miR-450a-2-3p	45	130	4.78278	10.6838	1.1595	Up	7.58e-05	0.000513658
hsa-miR-186-5p	5009	14002	532.377	1150.73	1.11203	Up	0	0
hsa-miR-30a-3p	16307	45150	1733.17	3710.57	1.09822	Up	0	0
hsa-miR-215-5p	61	167	6.48333	13.7246	1.08196	Up	2.84e-05	0.000201381
hsa-miR-10a-3p	403	1099	42.8325	90.3193	1.07633	Up	6.2e-27	9.73e-26
hsa-miR-10a-5p	147538	397574	15680.9	32673.9	1.05913	Up	0	0
hsa-miR-1273h-3p	594	1589	63.1327	130.589	1.04857	Up	2.87e-36	5.27e-35
hsa-miR-128-3p	3493	9292	371.25	763.646	1.04051	Up	3.99e-200	1.54e-198
hsa-let-7g-5p	54552	144360	5798.01	11864	1.03296	Up	0	0
hsa-miR-1237-3p	107	280	11.3724	23.0113	1.01681	Up	3.57e-07	3.03e-06
hsa-miR-10b-3p	225	585	23.9139	48.0771	1.0075	Up	2.83e-13	3.1e-12
1	306	4	32.5229	0.328733	-6.6284	Down	1.31e-114	4.05e-113
hsa-miR-21-3p	591	12	62.8139	0.986198	-5.99306	Down	1.81e-213	7.23e-212
hsa-miR-3648	353	18	37.5183	1.4793	-4.66461	Down	1.14e-114	3.55e-113
hsa-miR-4485-3p	19	1	2.0194	0.0821831	-4.61894	Down	2.98e-07	2.55e-06
hsa-miR-6865-3p	14	1	1.48798	0.0821831	-4.17837	Down	2.22e-05	0.000161645
hsa-miR-548at-3p	14	1	1.48798	0.0821831	-4.17837	Down	2.22e-05	0.000161191
hsa-miR-6779-5p	14	1	1.48798	0.0821831	-4.17837	Down	2.22e-05	0.00016074
hsa-miR-449c-5p	27	2	2.86967	0.164366	-4.1259	Down	2.5e-09	2.39e-08
hsa-miR-296-3p	92	7	9.77813	0.575282	-4.08722	Down	1.12e-28	1.81e-27
hsa-miR-652-5p	13	1	1.38169	0.0821831	-4.07145	Down	5.2e-05	0.000356927
hsa-miR-875-5p	173	14	18.3871	1.15056	-3.99828	Down	6.53e-52	1.37e-50
hsa-miR-587	12	1	1.27541	0.0821831	-3.95597	Down	0.000121333	0.000795573
hsa-miR-611	90	8	9.56556	0.657465	-3.86286	Down	4.5e-27	7.16e-26
hsa-miR-4429	22	2	2.33825	0.164366	-3.83044	Down	1.68e-07	1.46e-06
hsa-miR-6724-5p	681	68	72.3794	5.58845	-3.69506	Down	1.58e-188	5.85e-187
hsa-miR-2116-3p	20	2	2.12568	0.164366	-3.69294	Down	8.88e-07	7.28e-06
hsa-miR-5689	18	2	1.91311	0.164366	-3.54094	Down	4.62e-06	3.6e-05
hsa-miR-33b-3p	45	5	4.78278	0.410916	-3.54094	Down	2.13e-13	2.35e-12
hsa-miR-4490	17	2	1.80683	0.164366	-3.45847	Down	1.05e-05	7.94e-05
hsa-miR-562	17	2	1.80683	0.164366	-3.45847	Down	1.05e-05	7.92e-05
hsa-miR-1537-5p	17	2	1.80683	0.164366	-3.45847	Down	1.05e-05	7.9e-05
hsa-miR-1296-5p	355	42	37.7308	3.45169	-3.45037	Down	5.43e-94	1.43e-92
hsa-miR-6773-3p	1095	132	116.381	10.8482	-3.42333	Down	2.59e-284	1.18e-282
hsa-miR-4262	40	5	4.25136	0.410916	-3.37101	Down	1.21e-11	1.24e-10
hsa-miR-1226-5p	16	2	1.70054	0.164366	-3.37101	Down	2.36e-05	0.000170022
hsa-miR-1277-3p	31	4	3.2948	0.328733	-3.32521	Down	3.26e-09	3.1e-08
hsa-miR-6789-5p	23	3	2.44453	0.246549	-3.30961	Down	4.05e-07	3.41e-06
hsa-miR-6840-5p	128	18	13.6044	1.4793	-3.20109	Down	7.24e-33	1.22e-31
hsa-miR-339-5p	526	74	55.9054	6.08155	-3.20048	Down	5.53e-130	1.79e-128
hsa-miR-1228-3p	14	2	1.48798	0.164366	-3.17837	Down	0.000117717	0.000777774
hsa-miR-513b-5p	14	2	1.48798	0.164366	-3.17837	Down	0.000117717	0.000775795
hsa-miR-2277-5p	21	3	2.23196	0.246549	-3.17837	Down	1.99e-06	1.62e-05
hsa-miR-654-5p	1428	206	151.774	16.9297	-3.16429	Down	0	0
hsa-miR-541-3p	55	8	5.84562	0.657465	-3.15237	Down	9.5e-15	1.12e-13
hsa-miR-1307-5p	102	15	10.841	1.23275	-3.13655	Down	4.73e-26	7.3e-25
hsa-miR-5683	351	52	37.3057	4.27352	-3.1259	Down	1.47e-85	3.71e-84
hsa-miR-1298-3p	215	32	22.8511	2.62986	-3.1192	Down	5.88e-53	1.26e-51
hsa-miR-214-3p	433	66	46.021	5.42409	-3.08484	Down	6.49e-104	1.85e-102
hsa-miR-3187-3p	32	5	3.40109	0.410916	-3.04908	Down	6.8e-09	6.31e-08
hsa-miR-134-3p	93	15	9.88441	1.23275	-3.00328	Down	5.02e-23	7.26e-22
hsa-miR-4443	1841	309	195.669	25.3946	-2.94582	Down	0	0
hsa-miR-5707	47	8	4.99535	0.657465	-2.9256	Down	4.65e-12	4.79e-11
hsa-miR-370-3p	6411	1094	681.387	89.9083	-2.92195	Down	0	0
hsa-let-7a-2-3p	92	16	9.77813	1.31493	-2.89457	Down	4.45e-22	6.33e-21
hsa-miR-345-5p	485	85	51.5478	6.98557	-2.88346	Down	3.22e-109	9.57e-108
hsa-miR-3187-5p	91	16	9.67185	1.31493	-2.87881	Down	9.48e-22	1.33e-20
hsa-miR-1343-5p	17	3	1.80683	0.246549	-2.87351	Down	4.55e-05	0.000315894
hsa-miR-4746-3p	17	3	1.80683	0.246549	-2.87351	Down	4.55e-05	0.000315049
hsa-miR-99b-5p	70699	12759	7514.17	1048.57	-2.84119	Down	0	0
hsa-miR-2392	174	32	18.4934	2.62986	-2.81395	Down	2.27e-39	4.32e-38
hsa-miR-744-5p	1362	260	144.759	21.3676	-2.76015	Down	9.43e-291	4.36e-289
hsa-miR-134-5p	6910	1320	734.423	108.482	-2.75916	Down	0	0
hsa-miR-877-5p	31	6	3.2948	0.493099	-2.74024	Down	5.73e-08	5.05e-07
hsa-miR-941	12144	2380	1290.71	195.596	-2.72222	Down	0	0
hsa-miR-3940-3p	91	18	9.67185	1.4793	-2.70888	Down	1.36e-20	1.86e-19
hsa-miR-433-3p	171	34	18.1746	2.79423	-2.7014	Down	2.9e-37	5.41e-36
hsa-miR-6766-5p	20	4	2.12568	0.328733	-2.69294	Down	1.7e-05	0.000125794
hsa-miR-127-3p	42441	8602	4510.8	706.939	-2.67373	Down	0	0
hsa-miR-7977	154	32	16.3677	2.62986	-2.6378	Down	5.85e-33	9.9e-32
hsa-miR-1268a	24	5	2.55082	0.410916	-2.63405	Down	2.99e-06	2.39e-05
hsa-miR-125b-1-3p	4921	1032	523.024	84.813	-2.62452	Down	0	0
hsa-miR-766-3p	71	15	7.54617	1.23275	-2.61387	Down	7.31e-16	9.05e-15
hsa-miR-671-3p	511	108	54.3111	8.87578	-2.6133	Down	1.69e-104	4.87e-103
hsa-miR-652-3p	149	32	15.8363	2.62986	-2.59018	Down	2.2e-31	3.62e-30
hsa-miR-3613-5p	526	114	55.9054	9.36888	-2.57704	Down	5.22e-106	1.52e-104
hsa-miR-671-5p	36	8	3.82622	0.657465	-2.54094	Down	1.7e-08	1.55e-07
hsa-miR-1260a	2770	618	294.407	50.7892	-2.53522	Down	0	0
hsa-miR-320d	31	7	3.2948	0.575282	-2.51785	Down	1.96e-07	1.69e-06
hsa-miR-331-3p	170	39	18.0683	3.20514	-2.495	Down	2.69e-34	4.71e-33
hsa-miR-1258	26	6	2.76338	0.493099	-2.48649	Down	2.27e-06	1.84e-05
hsa-miR-4714-3p	26	6	2.76338	0.493099	-2.48649	Down	2.27e-06	1.83e-05
hsa-miR-1291	69	16	7.3336	1.31493	-2.47954	Down	1.02e-14	1.19e-13
hsa-miR-532-5p	3007	707	319.596	58.1035	-2.45955	Down	0	0
hsa-miR-574-3p	824	195	87.578	16.0257	-2.45018	Down	1.29e-156	4.46e-155
hsa-miR-320c	37	9	3.93251	0.739648	-2.41054	Down	2.62e-08	2.36e-07
hsa-miR-7974	1171	287	124.459	23.5866	-2.39963	Down	6.7e-217	2.76e-215
hsa-miR-4321	65	16	6.90846	1.31493	-2.39338	Down	1.72e-13	1.92e-12
hsa-miR-99b-3p	2842	706	302.059	58.0213	-2.38018	Down	0	0
hsa-miR-4722-5p	20	5	2.12568	0.410916	-2.37101	Down	5.48e-05	0.000374204
hsa-miR-199b-5p	36	9	3.82622	0.739648	-2.37101	Down	5.31e-08	4.71e-07
hsa-miR-1260b	3307	839	351.481	68.9516	-2.34979	Down	0	0
hsa-miR-6089	59	15	6.27076	1.23275	-2.34676	Down	3.79e-12	3.93e-11
hsa-miR-151a-5p	526	134	55.9054	11.0125	-2.34384	Down	4.62e-96	1.25e-94
hsa-miR-330-3p	113	29	12.0101	2.38331	-2.33321	Down	8.03e-22	1.14e-20
hsa-miR-320a	2583	665	274.532	54.6518	-2.32863	Down	0	0
hsa-miR-1288-3p	27	7	2.86967	0.575282	-2.31854	Down	3.38e-06	2.66e-05
hsa-miR-6087	23	6	2.44453	0.493099	-2.30961	Down	1.93e-05	0.000141818
hsa-miR-769-5p	2973	785	315.982	64.5138	-2.29217	Down	0	0
hsa-miR-93-5p	4407	1183	468.394	97.2226	-2.26836	Down	0	0
hsa-miR-7158-5p	81	22	8.60901	1.80803	-2.25143	Down	1.66e-15	2.02e-14
hsa-miR-4421	22	6	2.33825	0.493099	-2.24548	Down	3.87e-05	0.000270501
hsa-miR-328-3p	352	97	37.412	7.97176	-2.23053	Down	1.56e-61	3.48e-60
hsa-miR-210-3p	123	34	13.0729	2.79423	-2.22606	Down	1.64e-22	2.36e-21
hsa-miR-193b-3p	104	29	11.0535	2.38331	-2.21347	Down	3.72e-19	4.94e-18
hsa-miR-6851-5p	25	7	2.6571	0.575282	-2.20751	Down	1.36e-05	0.000101463
hsa-miR-339-3p	298	85	31.6726	6.98557	-2.18079	Down	4.23e-51	8.75e-50
hsa-miR-491-3p	21	6	2.23196	0.493099	-2.17837	Down	7.73e-05	0.000522561
hsa-miR-378a-3p	3058	882	325.017	72.4855	-2.16475	Down	0	0
hsa-miR-5010-5p	24	7	2.55082	0.575282	-2.14862	Down	2.68e-05	0.000192025
hsa-miR-301b-5p	24	7	2.55082	0.575282	-2.14862	Down	2.68e-05	0.000191496
hsa-miR-1285-3p	47	14	4.99535	1.15056	-2.11824	Down	4.83e-09	4.55e-08
hsa-miR-4511	20	6	2.12568	0.493099	-2.10798	Down	0.000152789	0.000996782
hsa-miR-6090	20	6	2.12568	0.493099	-2.10798	Down	0.000152789	0.000994278
hsa-miR-423-3p	2632	795	279.74	65.3356	-2.09814	Down	0	0
hsa-miR-324-5p	76	23	8.07759	1.89021	-2.09538	Down	1.27e-13	1.43e-12
hsa-miR-615-3p	412	125	43.789	10.2729	-2.09173	Down	7.91e-67	1.85e-65
hsa-miR-106b-3p	8349	2536	887.365	208.416	-2.09006	Down	0	0
hsa-miR-6871-5p	105	32	11.1598	2.62986	-2.08526	Down	3.6e-18	4.64e-17
hsa-miR-320b	72	22	7.65245	1.80803	-2.0815	Down	6.82e-13	7.32e-12
hsa-miR-127-5p	217	68	23.0636	5.58845	-2.0451	Down	3.95e-35	7.02e-34
hsa-miR-150-5p	41	13	4.35764	1.06838	-2.02812	Down	9.82e-08	8.57e-07
hsa-miR-665	82	26	8.71529	2.13676	-2.02812	Down	4.2e-14	4.81e-13
hsa-miR-191-3p	22	7	2.33825	0.575282	-2.02309	Down	0.000102731	0.000682238
hsa-miR-92b-3p	2298	732	244.241	60.158	-2.02147	Down	0	0
hsa-miR-3661	103	33	10.9473	2.71204	-2.01312	Down	3.32e-17	4.22e-16
hsa-miR-532-3p	37	12	3.93251	0.986198	-1.9955	Down	5.33e-07	4.43e-06
hsa-miR-1301-3p	154	50	16.3677	4.10916	-1.99394	Down	1.04e-24	1.57e-23
hsa-miR-125a-3p	242	80	25.7207	6.57465	-1.96795	Down	2.36e-37	4.43e-36
hsa-miR-484	589	196	62.6013	16.1079	-1.95842	Down	6.45e-88	1.67e-86
hsa-miR-490-3p	75	25	7.9713	2.05458	-1.95597	Down	1.51e-12	1.6e-11
hsa-miR-639	27	9	2.86967	0.739648	-1.95597	Down	2.37e-05	0.000170566
hsa-miR-4286	45	15	4.78278	1.23275	-1.95597	Down	4.49e-08	4.01e-07
hsa-miR-140-3p	1195	400	127.009	32.8733	-1.94995	Down	1.67e-175	6.09e-174
hsa-miR-128-1-5p	116	39	12.3289	3.20514	-1.94359	Down	1.77e-18	2.32e-17
hsa-miR-199a-5p	3033	1034	322.359	84.9774	-1.92352	Down	0	0
hsa-miR-1185-2-3p	152	52	16.1552	4.27352	-1.9185	Down	2.12e-23	3.11e-22
hsa-miR-1185-1-3p	324	111	34.436	9.12233	-1.91644	Down	5.73e-48	1.16e-46
hsa-miR-31-5p	233	80	24.7642	6.57465	-1.91327	Down	6.63e-35	1.17e-33
hsa-miR-500a-3p	154	53	16.3677	4.35571	-1.90988	Down	1.44e-23	2.11e-22
hsa-miR-181c-3p	61	21	6.48333	1.72585	-1.90943	Down	3.25e-10	3.18e-09
hsa-miR-3176	26	9	2.76338	0.739648	-1.90153	Down	4.51e-05	0.00031429
hsa-miR-1180-3p	1092	381	116.062	31.3118	-1.89012	Down	8.5e-155	2.9e-153
hsa-miR-185-3p	312	109	33.1606	8.95796	-1.88823	Down	1.77e-45	3.48e-44
hsa-miR-4684-3p	40	14	4.25136	1.15056	-1.88558	Down	4.52e-07	3.79e-06
hsa-miR-222-5p	177	62	18.8123	5.09535	-1.88442	Down	1.87e-26	2.9e-25
hsa-miR-431-5p	365	128	38.7937	10.5194	-1.88276	Down	9.86e-53	2.09e-51
hsa-miR-423-5p	4105	1454	436.296	119.494	-1.86837	Down	0	0
hsa-miR-455-5p	79	28	8.39644	2.30113	-1.86744	Down	1.61e-12	1.69e-11
hsa-miR-501-3p	180	64	19.1311	5.25972	-1.86286	Down	1.57e-26	2.44e-25
hsa-miR-193b-5p	42	15	4.46393	1.23275	-1.85644	Down	2.99e-07	2.55e-06
hsa-miR-331-5p	466	167	49.5284	13.7246	-1.85149	Down	1.52e-65	3.46e-64
hsa-miR-185-5p	1562	561	166.016	46.1047	-1.84833	Down	8.81e-215	3.56e-213
hsa-miR-551a	25	9	2.6571	0.739648	-1.84494	Down	8.52e-05	0.000573443
hsa-miR-3184-3p	4059	1462	431.407	120.152	-1.84419	Down	0	0
hsa-miR-769-3p	29	11	3.08224	0.904014	-1.76956	Down	3.6e-05	0.000252875
hsa-miR-27a-5p	3601	1374	382.729	112.92	-1.76103	Down	0	0
hsa-miR-30c-2-3p	2021	772	214.8	63.4454	-1.75941	Down	2.51e-261	1.1e-259
hsa-miR-4755-3p	34	13	3.61366	1.06838	-1.75803	Down	8.23e-06	6.29e-05
hsa-miR-197-3p	1500	576	159.426	47.3375	-1.75183	Down	1.75e-193	6.59e-192
hsa-miR-3195	91	35	9.67185	2.87641	-1.74952	Down	3.05e-13	3.34e-12
hsa-miR-1307-3p	821	316	87.2592	25.9699	-1.74847	Down	1.51e-106	4.45e-105
hsa-miR-4633-3p	132	51	14.0295	4.19134	-1.74298	Down	1.84e-18	2.4e-17
hsa-miR-4497	58	23	6.16447	1.89021	-1.70543	Down	1.02e-08	9.39e-08
hsa-miR-6836-5p	122	49	12.9667	4.02697	-1.68704	Down	1.45e-16	1.81e-15
hsa-miR-380-3p	57	23	6.05819	1.89021	-1.68034	Down	1.84e-08	1.68e-07
hsa-miR-3143	143	58	15.1986	4.76662	-1.6729	Down	5.67e-19	7.45e-18
hsa-miR-1292-5p	32	13	3.40109	1.06838	-1.67057	Down	2.75e-05	0.000195536
hsa-miR-1304-3p	371	151	39.4314	12.4097	-1.66788	Down	1.8e-46	3.55e-45
hsa-miR-4746-5p	532	217	56.5431	17.8337	-1.66474	Down	1.01e-65	2.32e-64
hsa-miR-4451	194	80	20.6191	6.57465	-1.649	Down	9.16e-25	1.39e-23
hsa-miR-758-3p	2089	865	222.027	71.0884	-1.64305	Down	2.25e-248	9.72e-247
hsa-miR-1268b	38	16	4.03879	1.31493	-1.61894	Down	7.29e-06	5.6e-05
hsa-miR-718	265	112	28.1653	9.20451	-1.6135	Down	2.17e-32	3.61e-31
hsa-miR-3074-5p	1741	739	185.04	60.7333	-1.60728	Down	8.75e-202	3.43e-200
hsa-miR-193a-5p	153	65	16.2615	5.3419	-1.60603	Down	2.84e-19	3.8e-18
hsa-miR-125b-2-3p	174	75	18.4934	6.16373	-1.58514	Down	2.23e-21	3.13e-20
hsa-miR-493-3p	5502	2428	584.775	199.541	-1.5512	Down	0	0
hsa-miR-365a-5p	124	55	13.1792	4.52007	-1.54385	Down	3.26e-15	3.9e-14
hsa-miR-539-3p	99	44	10.5221	3.61606	-1.54094	Down	2.04e-12	2.13e-11
hsa-miR-550a-5p	38	17	4.03879	1.39711	-1.53148	Down	1.47e-05	0.000109433
hsa-miR-191-5p	5845	2626	621.23	215.813	-1.52535	Down	0	0
hsa-miR-24-3p	12965	5882	1377.97	483.401	-1.51125	Down	0	0
hsa-miR-100-5p	566663	257920	60227.2	21196.7	-1.50658	Down	0	0
hsa-miR-4634	37	17	3.93251	1.39711	-1.493	Down	2.58e-05	0.000184995
hsa-miR-154-5p	67	31	7.12103	2.54768	-1.4829	Down	1.66e-08	1.52e-07
hsa-miR-93-3p	41	19	4.35764	1.56148	-1.48064	Down	1.05e-05	7.88e-05
hsa-miR-485-5p	79	37	8.39644	3.04078	-1.46534	Down	1.18e-09	1.14e-08
hsa-miR-935	333	156	35.3926	12.8206	-1.46499	Down	7.64e-36	1.38e-34
hsa-miR-7153-3p	181	85	19.2374	6.98557	-1.46147	Down	3.64e-20	4.91e-19
hsa-miR-6500-3p	74	35	7.86502	2.87641	-1.45118	Down	4.88e-09	4.58e-08
hsa-miR-1271-5p	139	66	14.7735	5.42409	-1.44556	Down	1.21e-15	1.48e-14
hsa-miR-432-5p	421	200	44.7456	16.4366	-1.44483	Down	4.18e-44	8.13e-43
hsa-miR-5002-3p	48	23	5.10163	1.89021	-1.43241	Down	3e-06	2.39e-05
hsa-miR-6842-3p	48	23	5.10163	1.89021	-1.43241	Down	3e-06	2.38e-05
hsa-miR-1275	33	16	3.50737	1.31493	-1.4154	Down	0.000122374	0.000800377
hsa-miR-2681-3p	35	17	3.71994	1.39711	-1.41283	Down	7.75e-05	0.000522916
hsa-miR-486-5p	121	60	12.8604	4.93099	-1.38298	Down	3.92e-13	4.27e-12
hsa-miR-128-2-5p	42	21	4.46393	1.72585	-1.37101	Down	2.15e-05	0.000158008
hsa-miR-103b	15473	7809	1644.53	641.768	-1.35755	Down	0	0
hsa-miR-1287-5p	158	80	16.7929	6.57465	-1.35286	Down	2.88e-16	3.59e-15
hsa-miR-3138	54	28	5.73934	2.30113	-1.31854	Down	2.61e-06	2.1e-05
hsa-miR-103a-3p	15282	7938	1624.23	652.37	-1.316	Down	0	0
hsa-miR-659-5p	100	52	10.6284	4.27352	-1.31443	Down	1.72e-10	1.69e-09
hsa-miR-362-5p	63	33	6.69589	2.71204	-1.3039	Down	4.65e-07	3.89e-06
hsa-miR-4633-5p	105	55	11.1598	4.52007	-1.3039	Down	7.59e-11	7.53e-10
hsa-miR-383-5p	255	134	27.1024	11.0125	-1.29927	Down	4.41e-24	6.53e-23
hsa-miR-3184-5p	626	332	66.5338	27.2848	-1.28599	Down	6.33e-56	1.39e-54
hsa-miR-485-3p	64	34	6.80218	2.79423	-1.28355	Down	4.94e-07	4.12e-06
hsa-miR-409-3p	4567	2461	485.399	202.253	-1.26301	Down	0	0
hsa-miR-379-5p	27624	14930	2935.99	1226.99	-1.25872	Down	0	0
hsa-miR-181a-2-3p	4039	2205	429.281	181.214	-1.24423	Down	0	0
hsa-miR-7641	249	136	26.4647	11.1769	-1.24355	Down	2.47e-22	3.54e-21
hsa-miR-107	385	212	40.9193	17.4228	-1.2318	Down	3.06e-33	5.25e-32
hsa-miR-376a-3p	63	35	6.69589	2.87641	-1.21901	Down	1.4e-06	1.14e-05
hsa-miR-412-5p	147	82	15.6238	6.73902	-1.21313	Down	2.01e-13	2.24e-12
hsa-miR-6500-5p	93	52	9.88441	4.27352	-1.20973	Down	5.44e-09	5.08e-08
hsa-miR-17-5p	1270	725	134.981	59.5828	-1.17979	Down	8e-100	2.25e-98
hsa-miR-3909	43	25	4.57021	2.05458	-1.15342	Down	0.000121037	0.000795651
hsa-miR-18a-5p	256	149	27.2087	12.2453	-1.15184	Down	7.1e-21	9.88e-20
hsa-miR-1273g-3p	53	31	5.63305	2.54768	-1.14473	Down	2.17e-05	0.000158708
hsa-miR-6822-3p	103	62	10.9473	5.09535	-1.10331	Down	7.54e-09	6.97e-08
hsa-miR-4794	53	32	5.63305	2.62986	-1.09893	Down	3.56e-05	0.000250394
hsa-miR-4419b	126	77	13.3918	6.3281	-1.0815	Down	2.84e-10	2.78e-09
hsa-miR-4530	254	161	26.9961	13.2315	-1.02878	Down	4.59e-18	5.86e-17
hsa-miR-28-3p	8677	5505	922.226	452.418	-1.02746	Down	0	0
hsa-miR-369-3p	1528	980	162.402	80.5395	-1.0118	Down	5.06e-98	1.41e-96
hsa-miR-424-3p	300	193	31.8852	15.8613	-1.00737	Down	1.63e-20	2.22e-19
